# Supplementary material for: A Mathematical Model of Quorum Sensing Induced Biofilm Detachment
Source: PubMed Central journal article supplement (PMC4511412; doi:10.1371/journal.pone.0132385), 2015-07-21
Supplement: pone.0132385.s001.pdf [file pone.0132385.s001.pdf]

## S1 Appendix: Additional Simulation Results.

1 We present here the details of additional simulation results, the implications of which are  
2 discussed in the main text. We refer the reader to the main text for model description,  
3 definition of output parameters, and simulation parameter values.

### 4 **Biofilm growth and dispersal**

5 We conducted more simulation experiments to investigate how quorum sensing induced  
6 dispersal affects the biofilm growth and dispersal events when the maximum dispersal  
7 rate  $\eta_1$  is varied. We considered a situation where the nutrient concentration has no  
8 influence on the quorum sensing signal production, i.e.  $\gamma(C) = 1$ . The parameters used  
9 are listed in Table 1 in the main text, except for the dispersal rate  $\eta_1$ , which was varied as  
10 0.6, 1.2, 1.8, 2.4, 3.0, 3.6,  $4.2d^{-1}$  and the dispersal threshold concentration  $\tau = 10nM$ . For  
11 low values of  $\eta_1$ , we observe a continuous biomass loss and that the amount of biomass in  
12 the biofilm, as well as the autoinducer concentration levels off, as shown in Figs.1a and  
13 1c. The smaller the maximum erosion rates  $\eta_1$ , the higher the plateau will be. Smaller  
14 maximum erosion rates lead to larger biofilms, cf Fig.1d.

15 The lower the dispersal rate is, the more continuous is cell dispersal, even for small  
16 value of  $\tau$ . For higher values of  $\eta_1$ , the dispersal events are rapid and discrete as we have  
17 seen before for small induction thresholds (see main text). Again, after each dispersal  
18 event, too few bacterial cells are left behind to produce enough autoinducers to maintain  
19 dispersal; the signal concentration falls back below threshold, cf Fig.1c and the biofilm  
20 starts growing again. When the amount of biomass becomes strong enough for the con-  
21 centration of the quorum sensing signal molecule to reach threshold, the next dispersal  
22 event is triggered, etc. The frequency of the dispersal events changes as  $\eta_1$  changes, but  
23 the amplitude appears to be insensitive to this parameter. In all cases the vast majority  
24 of biomass produced in the biofilm is lost, cf Fig.1b.

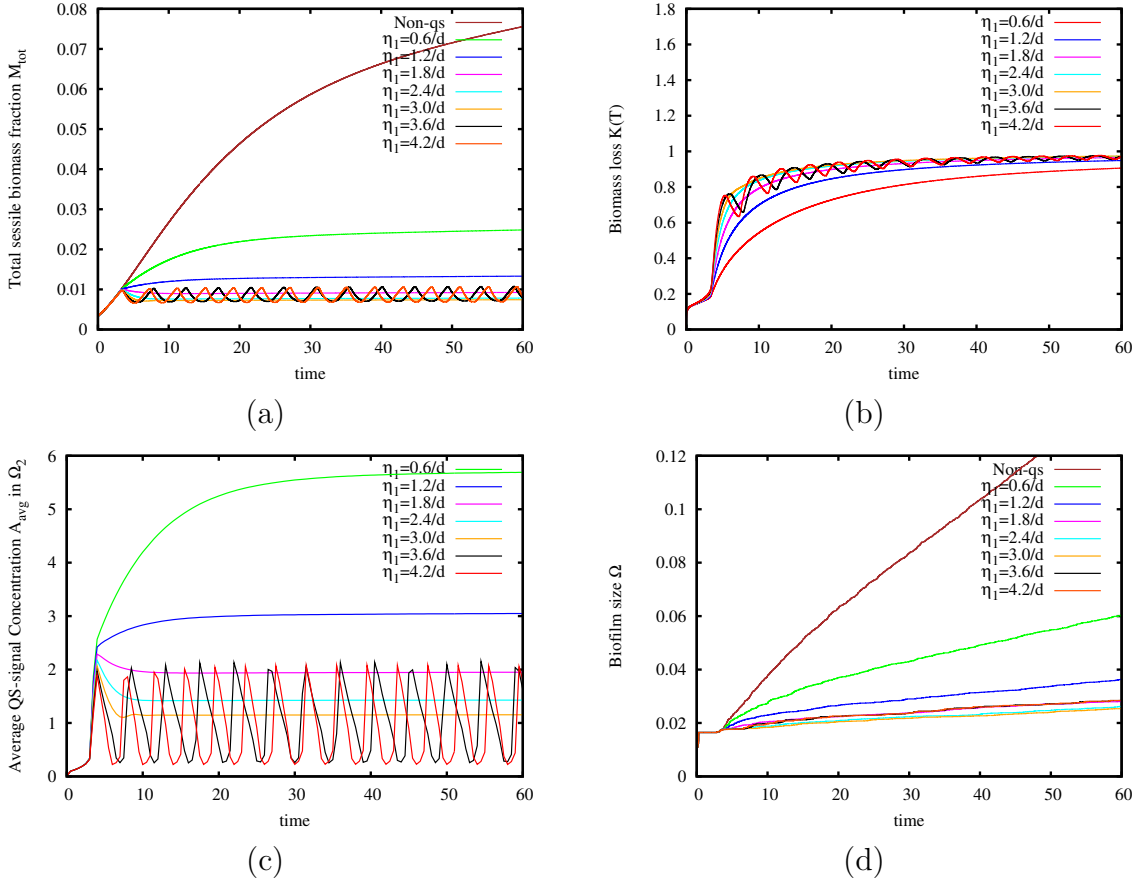

Fig. 1: **Temporal plots of simulations of a non-quorum sensing biofilm (Non-QS) and a quorum sensing biofilm.** Here we used seven different dispersal rates  $\eta_1 = \{0.6, 1.2, 1.8, 2.4, 3.0, 3.6, 4.2d^{-1}\}$  and fixed quorum sensing threshold  $\tau = 10nM$ . Shown are (a) the total amount of sessile biomass in the biofilm,  $M_{tot}(t)$ , (b) biomass loss  $K(T)$  indicating the amount of biomass that actually dispersed, (c) the average autoinducer concentration  $A_{avg}(t)$  in  $\Omega_2$ , (d) the biofilm size  $\Omega(t)$ .

## 25 Nutrient induced autoinducer production

26 The dependence of the quorum sensing signal production is controlled by the function  
 27  $\gamma(C)$  which is defined in such a way that  $0 < \gamma(C) \leq 1$  where the nutrient concentration  
 28  $C$  lies between zero and unity. The  $\gamma(C)$  is so defined to help capture the effect of  
 29 nutrient availability on the production of quorum sensing when the nutrient is limited  
 30 and when it is in abundance respectively. We test for different choices of  $\gamma(C)$ , depicted  
 31 in Fig.2.  $\gamma_1(C) \equiv 1$  reflects the scenario where signal production does not depend on  
 32 nutrient availability. This is our baseline scenario. Function  $\gamma_2(C)$  describes the scenario

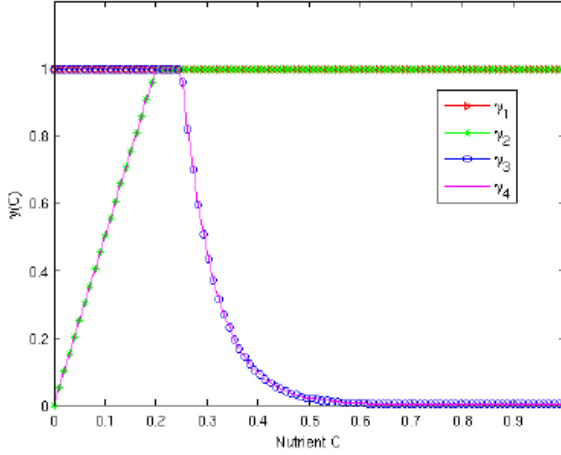

$$\begin{aligned} \gamma_1(C; k_2, k_3) &= 1 \\ \gamma_2(C; k_2, k_3) &= \begin{cases} \frac{C}{k_2}, & \text{if } C \leq k_2 \\ 1, & \text{otherwise} \end{cases} \\ \gamma_3(C; k_2, k_3) &= \begin{cases} 1, & \text{if } C \leq k_3 \\ -e^{-(C-k_3)\log(\frac{eps}{2-k_3})}, & \text{otherwise} \end{cases} \\ \gamma_4(C; k_2, k_3) &= \begin{cases} \frac{C}{k_2}, & \text{if } C \leq k_2 \\ 1, & k_2 < C \leq k_3 \\ -e^{-(C-k_3)\log(\frac{eps}{2-k_3})}, & \text{otherwise} \end{cases} \end{aligned}$$

Fig. 2: **The nutrient dependent functions**  $\gamma_i(C)$ ,  $i = 1, 2, 3, 4$ . This function controls the production of quorum sensing molecule in the biofilm

33 where for low nutrient concentrations the signal production rate is proportional to the  
 34 nutrient concentration whereas for larger nutrient concentrations the signal production  
 35 rate is independent of the nutrient concentration, cf [2]. This reflects the argument that  
 36 signal production is expensive and not affordable under unfavourable conditions. The  
 37 opposite is the scenario described by  $\gamma_3(C)$ , where the signal production rate is highest  
 38 during periods of low substrate availability, but it decreases if the substrate concentration  
 39 increases. In this scenario signal production is a stress response. In  $\gamma_4(C)$  these both  
 40 effects are accounted for: the signal production rate is proportional to the substrate  
 41 concentrations under conditions of low availability, it attains its maximum at intermediate  
 42 substrate concentrations and declines as substrate becomes more and more plentiful, cf  
 43 also [1].

44 For the simulation results shown in Fig.3, we fix  $\tau = 120nM$  and  $\eta_1 = 0.6d^{-1}$  while  
 45 every other parameter used is listed on Table 1 in the main text. The choice of parameters  
 46 in this simulation enables the investigation under limited substrate concentration for a  
 47 biofilm with all the boundary conditions defined and described in the previous sections.

48 Note that the value of  $\tau$  is chosen here higher than in our other simulations, in order  
49 to delay induction to allow the biofilm to grow bigger before dispersal starts and thus  
50 to enforce a lower nutrient concentration. A similar effect could have been achieved by  
51 reducing  $\alpha$  and  $\beta$ .

52 On the other hand to enable the investigation under increased availability of nutrients  
53 we have considered also a microfloc, i.e. a biofilm without substratum. We prescribe a  
54 non-homogeneous Dirichlet boundary condition for the substrate on all the boundaries  
55 to ensure a constant supply of nutrients to the flocs across all domain boundaries i.e.  
56  $C = C_\infty$ , where  $C_\infty$  is the bulk concentration value. Moreover, we pose a homogeneous  
57 Neumann boundary condition for the autoinducers on all the boundaries of the microfloc  
58 system to ensure that the signal molecules does not leave the system and is not diluted, i.e.  
59  $\partial_n A = 0$ . For the biomass, we pose a homogeneous Dirichlet boundary condition on all  
60 the boundaries for the biomass i.e.  $M = N = 0$ , which allows the bacterial cells to leave  
61 from any of the boundaries. For the microfloc, we fix the signal threshold concentration  
62  $\tau = 50nM$  and the maximum dispersal rate  $3.6d^{-1}$  while every other parameter used is  
63 as listed in Table 1 in the main text. Lumped output parameters for these simulations  
64 are presented in Figs.3 and 4.

65 We first focus on the biofilm (Fig.3). High nutrient concentrations are observed only  
66 initially and decline quickly as the biofilm grows. The concentration of the nutrient  
67 in the biofilm is not affected by the production of the quorum sensing signal molecule  
68 production rate which depends on the nutrient. Once the nutrient concentration drops  
69 below the concentration value  $k_2$  we see a clear separation of curves for the total biomass  
70 density, biofilm size, fraction of dispersed cells and total amount of dispersed cells. The  
71 curves obtained for  $\gamma_2(C)$  and  $\gamma_4(C)$ , which are sensitive to low concentration values are  
72 grouped together, as well as the curves for  $\gamma_1(C)$  and  $\gamma_3(C)$  which are not sensitive to  
73 low substrate concentrations. As long as the substrate concentration is above  $k_2$  we do  
74 not detect a notable difference between the four curves.

75 In contrast to the biofilm, the autoinducer concentration level in the microfloc is sen-  
76 sitive to high nutrient concentration as shown in Fig.4. There is an increased autoinducer  
77 concentration level in the case of  $\gamma_3$  and  $\gamma_4$  when the nutrient concentration is above the  
78 concentration value  $k_2$  and below  $k_3$ ; these results are grouped together and are sensitive to  
79 high nutrient concentration. On the other hand, the autoinducer concentration is low for  
80  $\gamma_1$  and  $\gamma_2$  which are grouped together and are insensitive to high nutrient concentration.

81 In general, we observe that the different concentration levels of the quorum sensing  
82 signal does not translate to cell dispersal.

## 83 References

- 84 [1] Bjorn MJ, Sokol PA, and Iglewski BH: **Influence of iron on yields of extra-**  
85 **cellular products in *Pseudomonas aeruginosa* cultures.** *J. Bacteriol* 1979,  
86 **138**:193-200.
- 87 [2] Bollinger N, Hassett DJ, Iglewski BH, Costerton JW, and McDermott TR: **Gene**  
88 **expression in *Pseudomonas aeruginosa*: evidence of iron override effects**  
89 **on quorum sensing and biofilm-specific gene regulation.** *J. Bacteriol.* 2001,  
90 **183**:1990-1996.
- 91 [3] D'Argenio DA, Calfee MW, Rainey, PB and Pesci EC. **Autolysis and autoaggre-**  
92 **gation in *Pseudomonas aeruginosa* colony morphology mutants.** *J. Bacte-*  
93 *riol* 2002, **184**, 6481-6489.
- 94 [4] Hunt SM, Hamilton MA, Sears JT, Harkin G, and Reno J: **A computer investiga-**  
95 **tion of chemically mediated detachment in bacterial biofilms.** *Microbiology*  
96 2003, **149**:1155-1163.

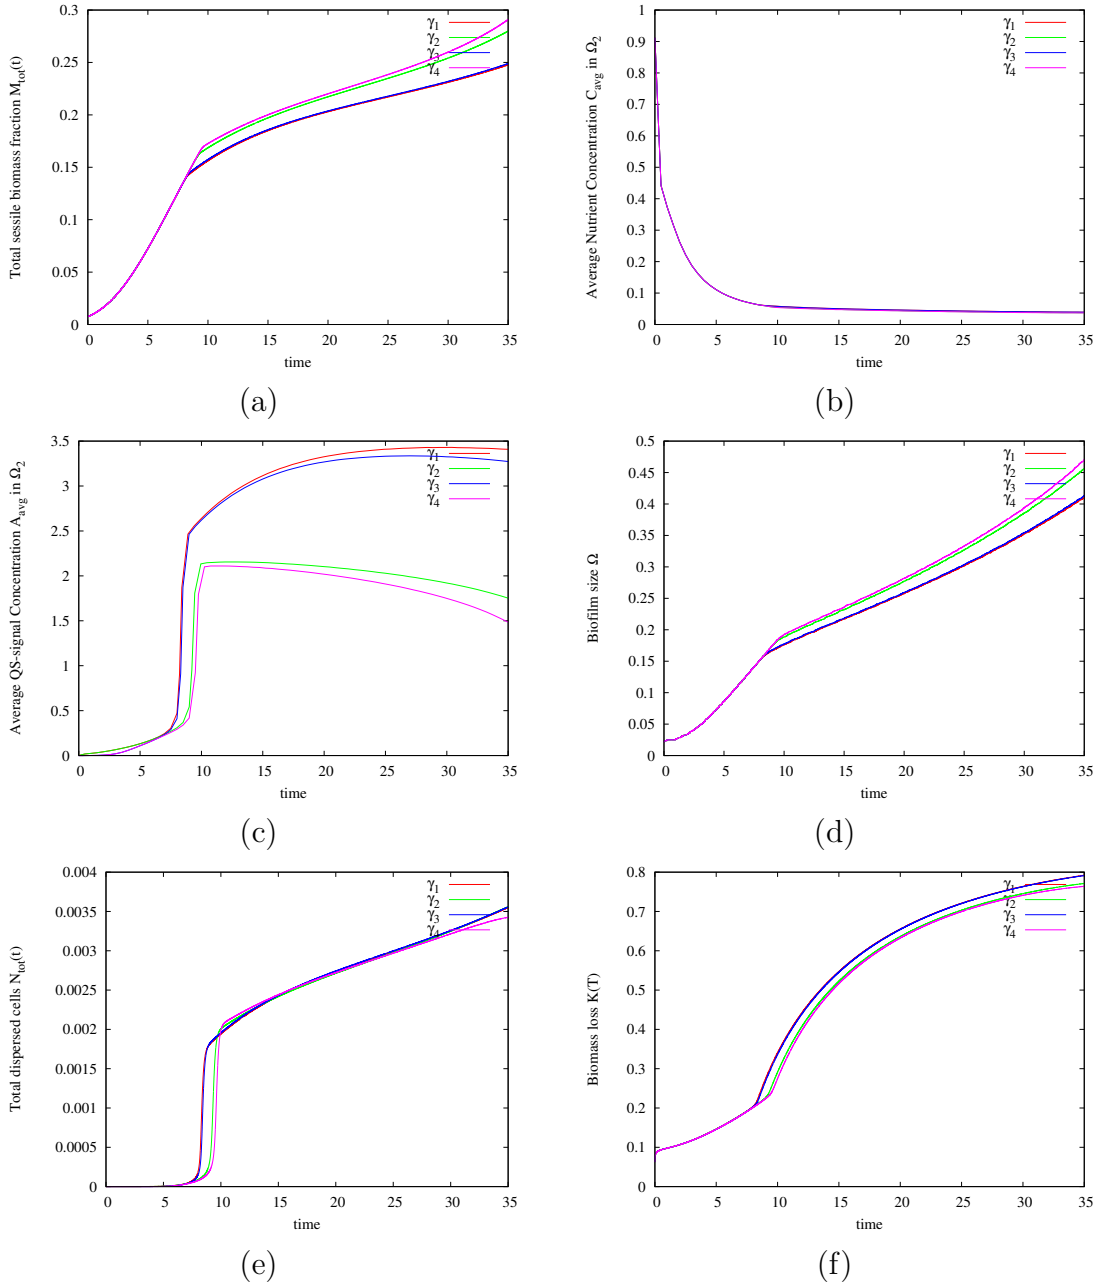

Fig. 3: **Temporal plots of simulations of a biofilm using different  $\gamma_i(C)$ .** Here we used  $\tau = 120nM$ ,  $\eta_1 = 0.6d^{-1}$ . Shown are (a) total sessile biomass fraction  $M_{tot}$  in the biofilm, (b) average concentration of the nutrients  $C_{avg}$  in  $\Omega_2$ , (c) average autoinducer concentration  $A_{avg}$  in  $\Omega_2$ , (d) biofilm size  $\omega$ , (e) total dispersed cells  $N_{tot}$ , (f) biomass loss  $K(T)$  indicating the fraction of the produced biomass that are actually dispersed from the biofilm.

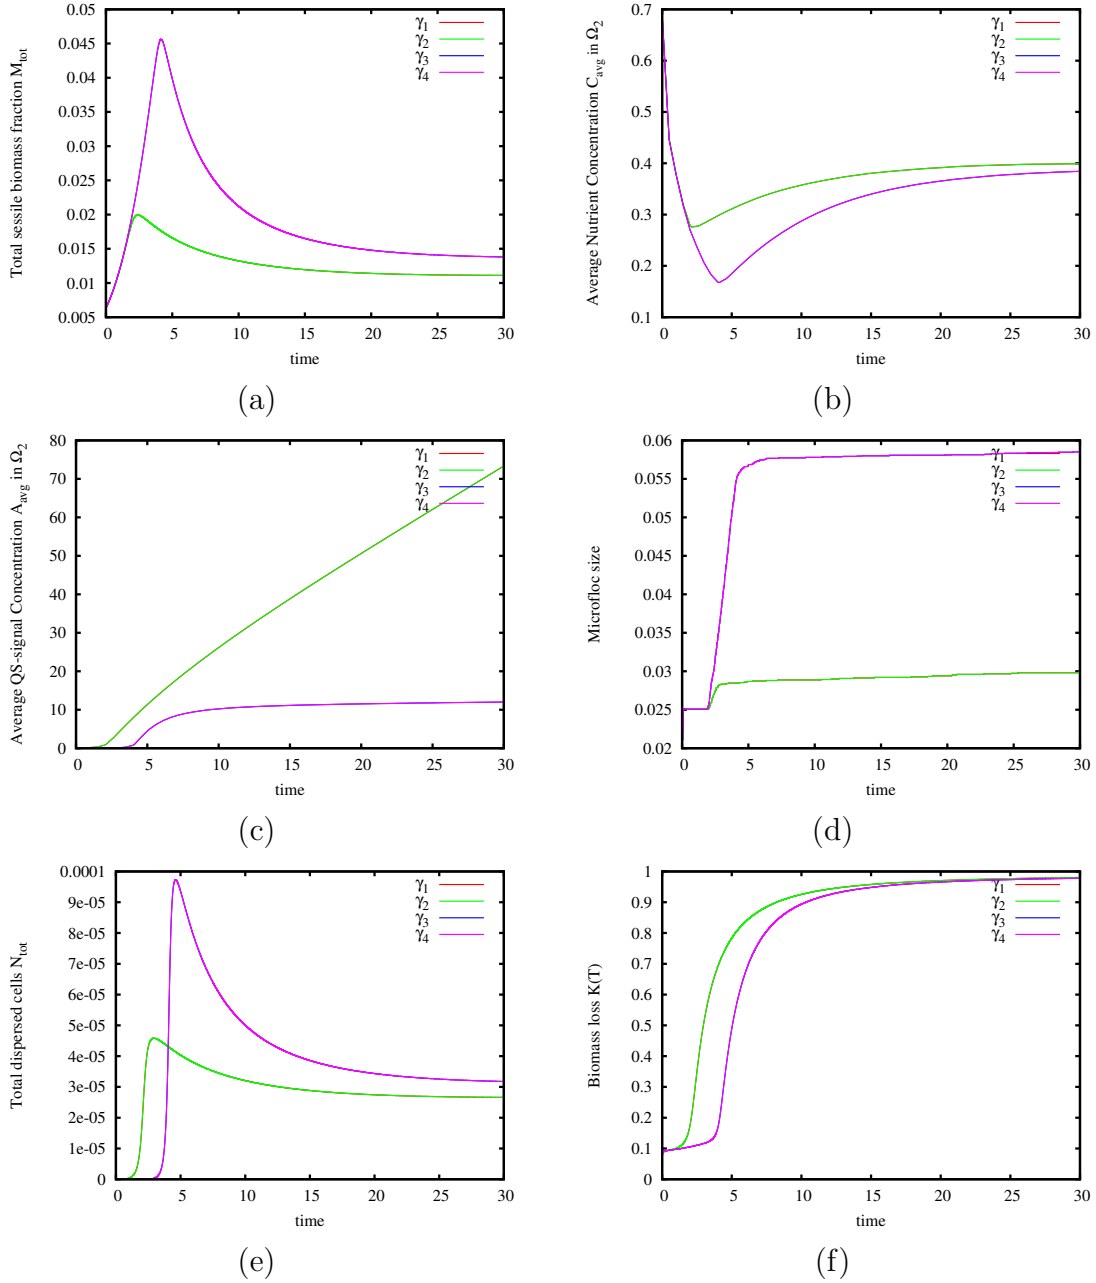

Fig. 4: **Temporal plots of simulations of a microfloc using different  $\gamma_i(C)$ .** Here we used  $\tau = 50nM$ ,  $\eta_1 = 3.6d^{-1}$ . Shown are (a) total sessile biomass fraction  $M_{tot}$  in the microfloc, (b) average concentration of the nutrients  $C_{avg}$  in  $\Omega_2$ , (c) average autoinducer concentration  $A_{avg}$  in  $\Omega_2$ , (d) microfloc size  $\Omega$ , (e) total dispersed cells  $N_{tot}$ , (f) biomass loss  $K(T)$  indicating the fraction of the produced biomass that are actually dispersed from the microfloc. The curves of  $\gamma_1$  and  $\gamma_2$  (insensitive to high nutrient concentrations) are grouped together and appear as one curve; and so are those of  $\gamma_3$  and  $\gamma_4$  (sensitive to high nutrient concentrations).
